# Supplementary material
Source: PubMed Central journal article supplement (PMC3719551)
Supplement: JB.00372-13_zjb999092711so1.pdf [file JB.00372-13_zjb999092711so1.pdf]

Supplemental material

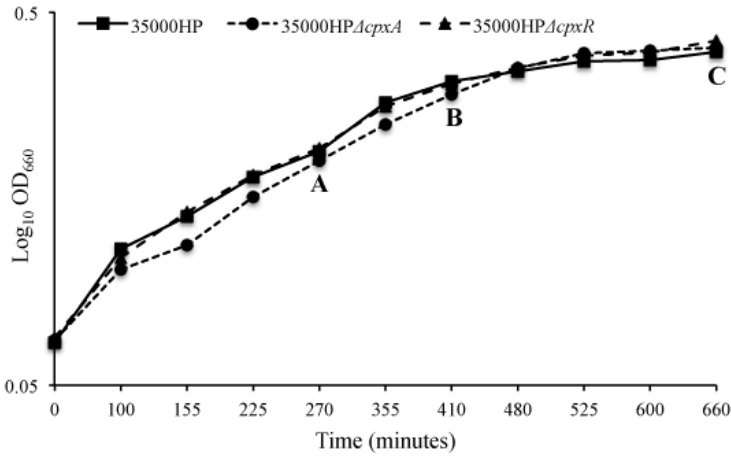

**Figure S1.** Growth kinetics of 35000HP, 35000HPΔcpxA, and 35000HPΔcpxR in GC broth. Growth kinetics was determined by measuring the optical density at 660 nm (OD<sub>660</sub>) at different time points following inoculation from overnight cultures. A, B, and C indicate the time points at which bacteria were harvested for RNA isolation in the mid-log, transition, and stationary growth phases, respectively.

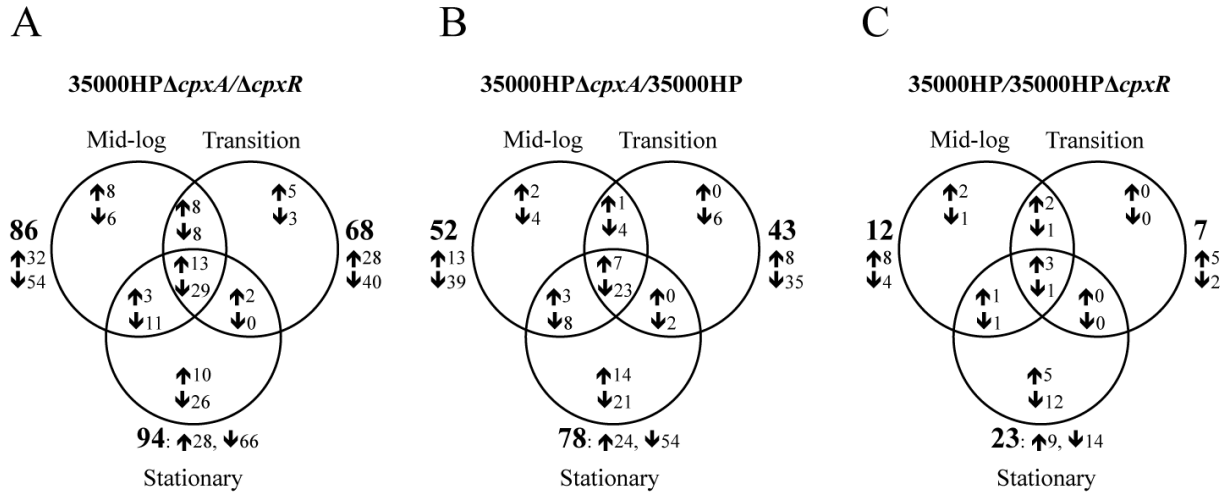

13

14 **Figure S2.** Venn diagram showing the number of genes or operons differentially regulated by

15 the Cpx 2CST at different phases of growth. (A) 35000HPΔ*cpxA* compared to 35000HPΔ*cpxR*;

16 (B) 35000HPΔ*cpxA* compared to 35000HP; and (C) 35000HP compared to 35000HPΔ*cpxR*. The

17 up- and downregulated genes or operons are indicated by up (↑) and down (↓) arrows,

18 respectively. The total number of genes or operons differentially regulated in different phases of

19 growth is indicated in bold outside the Venn diagram.

20

21

22

23

24

25

26

27

28

29

30 TABLE S1. Primers used in this study

| Primer (gene)                                              | 5' to 3' sequence <sup>a</sup>                                           |
|------------------------------------------------------------|--------------------------------------------------------------------------|
| <b>Primers used for qRT-PCR</b>                            |                                                                          |
| P1 ( <i>dnaE</i> F)                                        | AACGTTACCTTCAGCAAGCGGTTT                                                 |
| P2 ( <i>dnaE</i> R)                                        | GGCGTTTGGGATCGTCGAGTGTAT                                                 |
| P3 ( <i>ccmD</i> F)                                        | CGCAGATTCTTTTGGCATGGGA                                                   |
| P4 ( <i>ccmD</i> R)                                        | CTCGGTAAGACAACCAAATTAGCCC                                                |
| P5 ( <i>dsrA</i> F)                                        | ATTACAACAATGGCTCAGCAGCCG                                                 |
| P6 ( <i>dsrA</i> R)                                        | ACCGCCTTCATTAGACCAAGTCCA                                                 |
| P7 ( <i>fimA</i> F)                                        | ATATCAGCTATGGCTGCTCCTCCA                                                 |
| P8 ( <i>fimA</i> R)                                        | CCGCTGCAGTTTGCCTAAAATCAA                                                 |
| P9 ( <i>fis</i> F)                                         | CAATGCTGAATGCACAAGCACAGC                                                 |
| P10 ( <i>fis</i> R)                                        | ATCGTTGCCGCACGGGTTTGATTA                                                 |
| P11 ( <i>flp1</i> F)                                       | GGCTTAATTGCAGTCGCAGTTGCT                                                 |
| P12 ( <i>flp1</i> R)                                       | GTGCCATTAGCGCTACTTATACCAG                                                |
| P13 ( <i>HD0182</i> F)                                     | AATTGCCTTATCCAAACAGGCGGG                                                 |
| P14 ( <i>HD0182</i> R)                                     | TCTAATCTACCCGCCATACCGTCA                                                 |
| P15 ( <i>HD0430</i> F)                                     | AAATAGACCGCTTGTTACGCAAAA                                                 |
| P16 ( <i>HD0430</i> R)                                     | ATGCACCAATFCAATACCGCCTTG                                                 |
| P17 ( <i>HD1123</i> F)                                     | TTAGCCACGGTTGCGATTCTTCT                                                  |
| P18 ( <i>HD1123</i> R)                                     | CGCTGATGAAGCGGCTAATAACTC                                                 |
| P19 ( <i>HD1278</i> F)                                     | AGGTGTTCTAGTCGGTGTGCTTGA                                                 |
| P20 ( <i>HD1278</i> R)                                     | ACGCCAGTCTTCATAATTGCTGC                                                  |
| P21 ( <i>HD1577</i> F)                                     | TAAATCAAGCGCTCGCACCGAAAC                                                 |
| P22 ( <i>HD1577</i> R)                                     | AAACACACATTGTGGCGTGCCTTC                                                 |
| P23 ( <i>HD1667</i> F)                                     | CTGTACGACTCAAGCATGCGGTTT                                                 |
| P24 ( <i>HD1667</i> R)                                     | ATCTGGGCTAATGCCAAGCACAAAC                                                |
| P25 ( <i>lspB</i> F)                                       | AGCTAGAGCGGCTGACCCATTAAA                                                 |
| P26 ( <i>lspB</i> R)                                       | GTGAGAAAATTGCTCCGCTTTGGCT                                                |
| P27 ( <i>momp</i> F)                                       | ACAGGAAGCTGCACAGGTGTTAGA                                                 |
| P28 ( <i>momp</i> R)                                       | ATCACTTGGATTGCTGGTGTCCG                                                  |
| P29 ( <i>ompA2</i> F)                                      | GGTTGGGCAAGTTCCATAGAGGT                                                  |
| P30 ( <i>ompA2</i> R)                                      | ACCTAATTCAGCCGCTAAACCTGC                                                 |
| P31 ( <i>tadA</i> F)                                       | AATCAATGCCTTGCCTATGCGTCC                                                 |
| P32 ( <i>tadA</i> R)                                       | TGTATTGGCGTGCAGGGTAGACAT                                                 |
| P33 ( <i>tadD</i> F)                                       | AAATCACCGGTTCCACCGGCTAAA                                                 |
| P34 ( <i>tadD</i> R)                                       | TGAGATCGGCACGATACATGGCAA                                                 |
| P35 ( <i>waaA</i> F)                                       | CCGGCAACACATTCCGTTATCAT                                                  |
| P36 ( <i>waaA</i> R)                                       | AGGTTGCCAGCAGTGGTTAATTGC                                                 |
| <b>Primers used for generating the reporter constructs</b> |                                                                          |
| P37 ( <i>fimA</i> F)                                       | ATACCTAGATCTTTTGAACCTTCAAGTAATCAC                                        |
| P38 ( <i>fimA</i> R)                                       | AGGCGTAGATCTTTTACCTCTATAATTTAAG                                          |
| P39 ( <i>fis</i> F)                                        | GGGCCTAGATCTTAATTTTTTTAATTTGTCG                                          |
| P40 ( <i>fis</i> R)                                        | AGCTATAGATCTATTACCTCTCTACATAAGT                                          |
| P41 ( <i>HD0182</i> F)                                     | ATATCTAGATCTCCGTAAGTTAGTAATGGGAT                                         |
| P42 ( <i>HD0182</i> R)                                     | ATACCTAGATCTTTTTCGGAGGAATACTAGTT                                         |
| P43 ( <i>HD0430</i> F)                                     | ATATATAGATCTAGCGCGACTCCTCCTATAAT                                         |
| P44 ( <i>HD0430</i> R)                                     | ATACCTAGATCTTTATGGCTGTTACTCCCCAA                                         |
| P45 ( <i>HD1123</i> F)                                     | AGGGCTAGATCTTTGCCATTTAACCTTCTAA                                          |
| P46 ( <i>HD1123</i> R)                                     | AGGCCTAGATCTTGTCTCTCCTATATCAATA                                          |
| P47 ( <i>HD1278</i> F)                                     | ATATATAGATCTTATCTTGAGGGGGTAGTGTC                                         |
| P48 ( <i>HD1278</i> R)                                     | AGCCCTAGATCTAATTACTTGTAAGCAAGTAT                                         |
| P49 ( <i>gfp</i> R)                                        | CCTTACCCTCTCCACTGACAG                                                    |
| <b>Primers used for site directed mutagenesis</b>          |                                                                          |
| P50 ( <i>lspB</i> F1)                                      | CAGAAATTTTATGTAAACTGTGTACTCTTAAGTGAATAATGTATATTTAGGCTCAATTTGTTCAG        |
| P51 ( <i>lspB</i> R1)                                      | CTGAACAAAATTGAGCCATAAATATACATTAATTTCACTTAAAGAGTACACAGTTTACATAAAAAATTTCTG |
| P52 ( <i>lspB</i> F2)                                      | TAAAGCGGTTTATCTTATGGATAAAAATCAGAAATTTTTTATTGAAACTGTGTACTCTTAAGGTAA       |
| P53 ( <i>lspB</i> R2)                                      | TTACCTTAAAGAGTACACAGTTTCAATAAAAAATTTCTGATTTTATCCATAAGATAAACCGCTTTA       |
| P54 ( <i>lspB</i> F3)                                      | GTAAATTTCTTCAAAAAATGTGATCAATACCACAAATATTTGTAAAGCGGTTTATCTTATGGAT         |
| P55 ( <i>lspB</i> R3)                                      | ATCCATAAGATAAACCGCTTTACAAAAATTTGTGGTATTGATCACATTTTGAAGAAATTTAC           |
| P56 ( <i>lspB</i> F4)                                      | TTTCAAAGAATATCGTAAGCATAGCGTAATTTGTAAAATCGCCAAGTAAATTTCTTCAAAAAATG        |
| P57 ( <i>lspB</i> R4)                                      | CATTTTTGAAGAAATTTACTTGGCGATTTACAAAATTACGCTATGCTTACGATATCTTTGAAA          |

31 Underlining indicates regions corresponding to restriction enzyme sites as mentioned in the text. *H. ducreyi* sequences are from GenBank

32 accession no. AE017143.

33

34 TABLE S2. Summary of RNA-Seq read statistics

| Bacterial strain     | Growth phase | Biological replicate | Total reads | Aligned reads | % aligned reads | Average coverage/nt | Intergenic reads | % intergenic reads | Sense strand reads | Antisense strand reads |
|----------------------|--------------|----------------------|-------------|---------------|-----------------|---------------------|------------------|--------------------|--------------------|------------------------|
| 35000HP              | Mid-log      | R1                   | 15,225,615  | 15,073,797    | 99.0            | 3.9                 | 1,332,736        | 20.1               | 3,264,403          | 3,350,554              |
|                      |              | R2                   | 15,994,477  | 15,846,186    | 99.1            | 7.4                 | 3,491,752        | 27.6               | 6,195,035          | 6,436,339              |
|                      |              | R3                   | 26,414,698  | 26,163,706    | 99.1            | 4.3                 | 1,327,928        | 18.0               | 3,651,612          | 3,705,336              |
|                      |              | R4                   | 17,086,644  | 16,960,609    | 99.3            | 16.5                | 8,253,170        | 29.4               | 13,885,614         | 14,194,592             |
|                      | Transition   | R1                   | 4,945,592   | 4,884,640     | 98.8            | 8.9                 | 3,360,974        | 22.3               | 7,410,574          | 7,663,223              |
|                      |              | R2                   | 4,833,762   | 4,782,216     | 98.9            | 9.3                 | 3,527,705        | 22.3               | 7,845,956          | 8,000,230              |
|                      |              | R3                   | 10,599,323  | 10,502,085    | 99.1            | 15.4                | 8,488,500        | 32.4               | 12,870,827         | 13,292,879             |
|                      |              | R4                   | 7,714,771   | 7,648,797     | 99.1            | 10.0                | 3,299,502        | 19.5               | 8,434,645          | 8,525,964              |
|                      | Stationary   | R1                   | 6,680,671   | 6,614,957     | 99.0            | 2.9                 | 1,442,949        | 29.5               | 2,387,167          | 2,497,473              |
|                      |              | R2                   | 12,843,688  | 12,631,374    | 98.3            | 2.8                 | 1,228,311        | 25.7               | 2,357,938          | 2,424,278              |
|                      |              | R3                   | 7,418,648   | 7,356,948     | 99.2            | 6.2                 | 3,443,581        | 32.8               | 5,174,345          | 5,327,740              |
|                      |              | R4                   | 28,370,833  | 28,080,206    | 99.0            | 4.5                 | 2,028,504        | 26.5               | 3,779,182          | 3,869,615              |
| 35000HP <i>ΔcpxA</i> | Mid-log      | R1                   | 23,701,121  | 23,431,345    | 98.9            | 2.7                 | 1,122,811        | 24.4               | 2,260,436          | 2,334,841              |
|                      |              | R2                   | 11,294,894  | 11,176,809    | 99.0            | 2.4                 | 948,721          | 23.4               | 1,997,816          | 2,064,140              |
|                      |              | R3                   | 37,710,211  | 37,355,686    | 99.1            | 11.1                | 3,760,224        | 19.9               | 9,389,962          | 9,550,623              |
|                      |              | R4                   | 24,539,401  | 24,349,187    | 99.2            | 7.4                 | 3,110,643        | 24.9               | 6,206,546          | 6,305,878              |
|                      | Transition   | R1                   | 6,400,616   | 6,323,760     | 98.8            | 13.8                | 7,139,648        | 30.5               | 11,416,196         | 12,015,149             |
|                      |              | R2                   | 7,313,102   | 7,230,976     | 98.9            | 6.6                 | 2,955,641        | 26.4               | 5,531,784          | 5,645,025              |
|                      |              | R3                   | 18,280,426  | 18,108,138    | 99.1            | 22.0                | 12,731,210       | 34.1               | 18,339,026         | 19,016,660             |
|                      |              | R4                   | 3,733,851   | 3,704,868     | 99.2            | 14.3                | 6,091,105        | 25.0               | 12,071,598         | 12,277,589             |
|                      | Stationary   | R1                   | 4,649,206   | 4,595,277     | 98.8            | 3.7                 | 1,767,470        | 27.9               | 3,093,621          | 3,230,139              |
|                      |              | R2                   | 4,106,577   | 4,061,956     | 98.9            | 4.3                 | 2,140,229        | 29.6               | 3,563,903          | 3,667,073              |
|                      |              | R3                   | 19,075,447  | 18,940,585    | 99.3            | 10.7                | 4,382,836        | 24.2               | 8,962,292          | 9,145,846              |
|                      |              | R4                   | 12,620,310  | 12,512,424    | 99.1            | 2.2                 | 983,125          | 26.5               | 1,830,191          | 1,874,677              |
| 35000HP <i>ΔcpxR</i> | Mid-log      | R1                   | 7,529,543   | 7,415,285     | 98.5            | 9.4                 | 3,234,370        | 20.2               | 7,884,019          | 8,097,723              |
|                      |              | R2                   | 9,435,946   | 9,327,867     | 98.9            | 4.3                 | 1,183,968        | 16.4               | 3,583,428          | 3,655,197              |
|                      |              | R3                   | 39,280,869  | 38,932,499    | 99.1            | 1.5                 | 453,653          | 18.2               | 1,243,118          | 1,251,528              |
|                      |              | R4                   | 2,822,036   | 2,795,224     | 99.1            | 6.0                 | 1,829,008        | 17.8               | 5,111,306          | 5,153,895              |
|                      | Transition   | R1                   | 4,129,785   | 4,068,495     | 98.5            | 4.4                 | 2,052,319        | 27.7               | 3,638,832          | 3,776,453              |
|                      |              | R2                   | 9,096,015   | 8,979,203     | 98.7            | 5.5                 | 1,772,443        | 19.0               | 4,620,284          | 4,707,583              |
|                      |              | R3                   | 17,397,320  | 17,197,130    | 98.8            | 22.9                | 8,156,124        | 20.9               | 19,323,048         | 19,609,451             |
|                      |              | R4                   | 30,820,745  | 30,490,928    | 98.9            | 1.6                 | 743,131          | 26.6               | 1,391,673          | 1,403,551              |
|                      | Stationary   | R1                   | 16,185,039  | 15,981,742    | 98.7            | 2.4                 | 1,123,266        | 27.6               | 1,998,573          | 2,069,922              |
|                      |              | R2                   | 7,312,017   | 7,238,625     | 99.0            | 5.3                 | 2,526,528        | 28.1               | 4,421,590          | 4,557,613              |
|                      |              | R3                   | 2,519,648   | 2,494,646     | 99.0            | 10.1                | 4,446,631        | 25.9               | 8,509,360          | 8,687,770              |
|                      |              | R4                   | 10,362,439  | 10,265,201    | 99.1            | 17.9                | 6,562,677        | 21.5               | 15,144,383         | 15,346,545             |

35

36

37

38

39

40 TABLE S3. Individual genes differentially expressed in 35000HPΔ*cpxA* compared to  
 41 35000HPΔ*cpxR* at different phases of growth classified based on their functional categories

| Gene ID                                                | Gene name or homolog                                       | Mid-log |           | Transition |          | Stationary |           |
|--------------------------------------------------------|------------------------------------------------------------|---------|-----------|------------|----------|------------|-----------|
|                                                        |                                                            | Fold    | P-value   | Fold       | P-value  | Fold       | P-value   |
| <b>Amino acid biosynthesis</b>                         |                                                            |         |           |            |          |            |           |
| HD0564                                                 | <i>aspA</i> , aspartate amonia-lyase                       |         |           | 2.3        | 4.05E-04 |            |           |
| HD0577                                                 | <i>seld</i> , selenide, water dikinase                     | -2.0    | 1.94E-10  | -2.5       | 7.78E-05 | -2.2       | 2.49E-26  |
| HD0890                                                 | <i>argC</i> , N-acetyl-gamma-glutamyl-phosphate reductase  |         |           |            |          | 2.3        | 1.07E-28  |
| HD0896                                                 | <i>cysK</i> , O-acetylserine sulfhydrylase                 | -8.0    | 8.27E-70  | -8.1       | 2.73E-17 | -7.2       | 1.54E-147 |
| <b>Cell surface structures and associated proteins</b> |                                                            |         |           |            |          |            |           |
| <u>Lipooligosaccharide biosynthesis</u>                |                                                            |         |           |            |          |            |           |
| HD0454                                                 | <i>waaA</i> , 3-deoxy-D-manno-octulosonic-acid transferase |         |           |            |          | 2.1        | 6.84E-24  |
| HD0653                                                 | <i>waaF</i> , ADP-heptose-LPS heptosyltransferase II       |         |           |            |          | -2.3       | 1.55E-31  |
| HD1666                                                 | D,D-heptose 1,7-bisphosphate phosphatase                   | -2.2    | 3.33E-12  |            |          | -4.3       | 7.10E-88  |
| <u>Outer membrane proteins</u>                         |                                                            |         |           |            |          |            |           |
| HD0045                                                 | <i>momp</i> , major outer membrane protein                 | 2.0     | 7.15E-11  |            |          | 17.9       | 2.46E-290 |
| HD0046                                                 | <i>ompA2</i> , major outer membrane protein, OmpA2         | -20.1   | 3.15E-129 | -13.4      | 2.84E-24 | -30.5      | NS        |
| HD0047                                                 | No known homolog                                           | -5.8    | 6.71E-21  | -7.5       | 1.92E-14 | -9.9       | 4.45E-61  |
| HD0048                                                 | No known homolog                                           | -2.7    | 1.35E-10  | -3.9       | 2.64E-08 | -5.2       | 3.58E-51  |
| HD0646                                                 | Outer membrane receptor protein, iron transport            | -2.4    | 1.04E-15  |            |          |            |           |
| HD0746                                                 | <i>dltA</i> , Endo-1,4-beta-xylanase A                     |         |           | 2.4        | 2.25E-04 |            |           |
| HD0769                                                 | <i>dsrA</i> , serum resistance protein DsrA                | -17.7   | 7.84E-121 | -10.5      | 8.36E-21 | -40.4      | NS        |
| HD1017                                                 | 24 kDa outer membrane protein; MipA protein                | -3.9    | 7.80E-31  | -3.0       | 4.10E-06 | -5.7       | 1.97E-108 |
| HD1078                                                 | <i>ompP1</i> , outer membrane protein P1                   |         |           |            |          | -2.3       | 3.73E-32  |
| HD1155                                                 | <i>lspB</i> , large supernatant protein exporter           | -10.7   | 9.68E-80  | -5.7       | 8.47E-13 |            |           |
| HD1156                                                 | <i>lspA2</i> , large supernatant protein 2                 |         |           |            |          | -2.9       | 6.52E-51  |
| HD1170                                                 | <i>ompP4</i> , outer membrane protein P4                   |         |           |            |          | -2.1       | 1.86E-24  |
| HD1278                                                 | Serine protease                                            | -4.2    | 4.57E-37  | -2.9       | 5.36E-06 | -3.7       | 1.03E-72  |
| HD1280                                                 | Serine protease-like protein                               | -3.7    | 1.94E-31  | -2.4       | 1.29E-04 | -2.6       | 3.60E-42  |
| HD1326                                                 | <i>hhdB</i> , hemolysin activation/secretion protein       | -9.7    | 3.88E-81  | -6.2       | 6.75E-14 | -20.1      | 3.07E-290 |
| HD1327                                                 | <i>hhdA</i> , hemolysin                                    | -3.5    | 3.21E-29  | -2.7       | 1.61E-05 | -3.1       | 9.08E-54  |
| HD1433                                                 | <i>ompP2A</i> , outer membrane protein P2-like protein     | -12.2   | 6.76E-96  | -8.0       | 3.96E-17 | -9.8       | 9.08E-194 |
| HD1435                                                 | <i>ompP2B</i> , outer membrane protein P2-like protein     | 5.7     | 8.19E-53  | 3.0        | 3.61E-06 | 13.1       | 1.33E-240 |
| HD1856                                                 | Possible outer membrane protein                            | -8.5    | 1.86E-72  | -6.3       | 3.91E-14 | -5.2       | 2.16E-102 |
| HD1920                                                 | <i>ncaA</i> , Membrane protein: NcaA class II              | -6.7    | 6.28E-61  | -5.1       | 1.57E-11 | -8.8       | 4.53E-179 |
| HD2017                                                 | Rare lipoprotein A                                         | 2.4     | 3.84E-15  | 2.7        | 2.13E-05 |            |           |
| HD2025                                                 | <i>hgbA</i> , hemoglobin-binding protein HgbA              | -2.8    | 4.83E-21  | -2.3       | 2.68E-04 | -3.3       | 6.55E-61  |
| <u>Sialyltransferases</u>                              |                                                            |         |           |            |          |            |           |
| HD0685                                                 | <i>neuA</i> , acylneuraminate cytidyltransferase           |         |           | 2.4        | 1.28E-04 | 2.2        | 1.88E-27  |
| HD0686                                                 | <i>lst</i> , lipooligosaccharide sialyltransferase         |         |           | 2.3        | 3.26E-04 | 2.3        | 6.18E-30  |
| <u>Type I fimbriae</u>                                 |                                                            |         |           |            |          |            |           |
| HD0281                                                 | <i>fimA</i> , fimbrial major pilin protein                 | 16.0    | 6.27E-114 | 15.6       | 1.50E-26 | 9.8        | 2.90E-192 |
| HD0282                                                 | <i>fimB</i> , fimbrial structural subunit                  | 6.4     | 2.68E-57  | 6.6        | 1.08E-14 | 3.5        | 3.92E-61  |
| HD0283                                                 | <i>fimC</i> , fimbrial outer membrane usher protein        | 3.1     | 2.40E-24  | 2.6        | 3.93E-05 | 2.4        | 4.20E-34  |
| HD0284                                                 | <i>fimD</i> , periplasmic fimbrial chaperone               | 3.9     | 1.19E-33  | 2.8        | 1.48E-05 |            |           |
| HD0285                                                 | Minor fimbrial subunit                                     | 3.7     | 1.88E-30  | 3.0        | 3.52E-06 | 2.2        | 6.03E-25  |
| <u>Type IVa pili/type II secretion/competence</u>      |                                                            |         |           |            |          |            |           |
| HD0182                                                 | Prepilin peptidase dependent protein A                     |         |           |            |          | -20.1      | 4.19E-264 |
| HD0183                                                 | Prepilin peptidase dependent protein B                     |         |           |            |          | -19.4      | 6.27E-265 |
| HD0184                                                 | No known homolog                                           |         |           |            |          | -9.0       | 8.18E-168 |
| HD0185                                                 | Prepilin peptidase dependent protein C                     |         |           |            |          | -7.0       | 5.25E-120 |
| HD0209                                                 | <i>comF</i> , competence protein F                         |         |           |            |          | -2.7       | 3.84E-38  |
| HD0318                                                 | Fimbrial biogenesis and twitching motility protein         |         |           |            |          | -3.9       | 2.46E-72  |
| HD0427                                                 | <i>comA</i> , competence protein A-like protein            |         |           |            |          | -10.8      | 1.70E-172 |
| HD0428                                                 | Tfp pilus assembly protein ComA                            |         |           |            |          | -14.0      | 1.14E-176 |
| HD0429                                                 | No known homolog                                           |         |           |            |          | -13.2      | 2.50E-97  |
| HD0430                                                 | No known homolog                                           |         |           |            |          | -13.9      | 2.53E-126 |
| HD0431                                                 | No known homolog                                           |         |           |            |          | -10.3      | 1.95E-98  |

| Gene ID                                               | Gene name or homolog                                                                  | Mid-log |          | Transition |          | Stationary |           |
|-------------------------------------------------------|---------------------------------------------------------------------------------------|---------|----------|------------|----------|------------|-----------|
|                                                       |                                                                                       | Fold    | P-value  | Fold       | P-value  | Fold       | P-value   |
| HD0432                                                | No known homolog                                                                      |         |          |            |          | -9.7       | 3.43E-145 |
| HD0433                                                | Pilus assembly protein PilT/ComD                                                      |         |          |            |          | -11.2      | 9.54E-157 |
| HD0434                                                | <i>comE</i> , competence protein E/protein transport protein                          |         |          |            |          | -3.6       | 1.02E-66  |
| HD0650                                                | DNA uptake protein ComEA/type II secretion protein                                    |         |          |            |          | -5.1       | 2.55E-104 |
| HD0732                                                | <i>radC</i> , DNA repair protein RadC                                                 |         |          |            |          | -5.2       | 2.21E-66  |
| HD1123                                                | Prepilin peptidase dependent protein D                                                | -3.0    | 4.04E-15 |            |          | -54.0      | NS        |
| HD1124                                                | <i>hofB</i> , protein transport protein HofB, pili/fimbriae                           | -2.2    | 5.29E-12 |            |          | -28.2      | NS        |
| HD1125                                                | <i>hofC</i> , pili/fimbriae biogenesis protein                                        |         |          |            |          | -5.7       | 2.65E-114 |
| HD1126                                                | Fimbrial leader peptidase HopD                                                        |         |          |            |          | -3.6       | 4.89E-58  |
| HD1256                                                | <i>rec2</i> , recombination protein 2                                                 |         |          |            |          | -10.2      | 7.32E-195 |
| HD1888                                                | <i>smf</i> , DNA processing chain A                                                   |         |          |            |          | -3.3       | 1.24E-51  |
| HD1921                                                | <i>recG</i> , ATP-dependent DNA helicase RecG                                         | -3.4    | 5.34E-27 | -3.4       | 2.20E-07 | -2.5       | 9.83E-34  |
| HD1985                                                | DNA transformation protein, T(foX)/Sxy                                                | -7.9    | 2.05E-68 | -5.9       | 2.34E-13 | -9.5       | 4.94E-183 |
| <b>Flp pili and associated proteins</b>               |                                                                                       |         |          |            |          |            |           |
| HD1298                                                | <i>tadG</i> , tight adherence protein G                                               | -2.6    | 1.99E-18 |            |          | -2.8       | 1.08E-46  |
| HD1299                                                | <i>tadF</i> , tight adherence protein F                                               | -3.1    | 1.14E-23 | -2.0       | 2.22E-03 | -3.7       | 3.04E-67  |
| HD1300                                                | <i>tadE</i> , tight adherence protein E                                               | -2.8    | 1.50E-20 | -2.0       | 2.47E-03 | -3.0       | 1.88E-47  |
| HD1301                                                | <i>tadD</i> , tight adherence protein D                                               | -3.5    | 2.16E-28 | -2.2       | 6.00E-04 | -6.0       | 1.12E-125 |
| HD1302                                                | <i>tadC</i> , tight adherence protein C                                               | -3.9    | 5.14E-33 | -2.4       | 2.18E-04 | -6.0       | 1.14E-124 |
| HD1303                                                | <i>tadB</i> , tight adherence protein B                                               | -4.0    | 8.16E-34 | -2.4       | 2.35E-04 | -9.6       | 2.71E-183 |
| HD1304                                                | <i>tadA</i> , tight adherence protein A                                               | -3.5    | 5.90E-29 | -2.4       | 1.80E-04 | -9.4       | 5.06E-188 |
| HD1305                                                | <i>flp</i> operon protein D                                                           | -3.4    | 2.37E-27 | -2.3       | 3.73E-04 | -9.7       | 2.35E-190 |
| HD1306                                                | <i>rcpB</i> , rough colony protein B                                                  | -3.7    | 1.55E-30 | -2.6       | 6.05E-05 | -13.4      | 5.44E-233 |
| HD1307                                                | <i>rcpA</i> , rough colony protein A                                                  | -3.5    | 1.87E-29 | -2.6       | 3.52E-05 | -10.1      | 1.38E-197 |
| HD1308                                                | <i>flp</i> operon protein C                                                           | -3.9    | 1.72E-33 | -2.9       | 7.36E-06 | -12.4      | 4.41E-227 |
| HD1309                                                | <i>flp</i> operon protein B                                                           | -6.9    | 1.28E-60 | -3.7       | 3.06E-08 | -27.7      | NS        |
| HD1310                                                | <i>flp3</i> , <i>flp</i> operon protein Flp3                                          | -8.1    | 3.49E-69 | -3.8       | 2.19E-08 | -36.2      | NS        |
| HD1311                                                | <i>flp2</i> , <i>flp</i> operon protein Flp2                                          | -7.0    | 1.24E-58 | -3.6       | 6.17E-08 | -32.0      | NS        |
| HD1312                                                | <i>flp1</i> , <i>flp</i> operon protein Flp1                                          | -6.7    | 1.77E-55 | -3.6       | 5.95E-08 | -35.0      | NS        |
| <b>Cell wall biosynthesis and remodeling</b>          |                                                                                       |         |          |            |          |            |           |
| HD0687                                                | <i>rmlB</i> , dTDP-D-glucose 4,6-dehydratase                                          |         |          | 2.1        | 1.84E-03 |            |           |
| HD1400                                                | Soluble lytic murein transglycosylase                                                 | 2.4     | 4.03E-15 | 2.1        | 9.55E-04 | 2.5        | 3.03E-38  |
| HD2016                                                | <i>dacA</i> , D-alanyl-D-alanine carboxypeptidase fraction A                          | 2.3     | 6.07E-14 | 2.2        | 7.35E-04 |            |           |
| <b>Cofactor biosynthesis</b>                          |                                                                                       |         |          |            |          |            |           |
| HD1389                                                | <i>moaE</i> , molybdopterin converting factor subunit 2                               | -2.6    | 3.78E-17 | -2.5       | 7.38E-05 | -2.5       | 6.86E-34  |
| HD1390                                                | <i>moaD</i> , molybdopterin synthase small subunit                                    | -3.1    | 1.20E-21 | -2.5       | 1.01E-04 | -2.5       | 4.00E-30  |
| HD1391                                                | <i>moaC</i> , molybdenum cofactor biosynthesis protein C                              | -3.1    | 7.95E-23 | -2.8       | 1.42E-05 | -2.7       | 7.77E-39  |
| HD1392                                                | <i>moaA</i> , molybdenum cofactor biosynthesis protein A                              | -3.0    | 3.90E-22 | -2.2       | 9.72E-04 | -2.8       | 1.59E-45  |
| HD1480                                                | <i>bioD</i> , dithiobiotin synthetase                                                 |         |          |            |          | -2.5       | 7.05E-37  |
| HD1495                                                | Putative dithiobiotin synthetase                                                      | -2.1    | 9.84E-12 |            |          | -2.3       | 8.28E-29  |
| HD1874                                                | <i>ubiF</i> , 2-octaprenyl-3-methyl-6-methoxy-1,4-benzoquinol benzoquinol hydroxylase |         |          |            |          | -3.5       | 1.59E-65  |
| <b>Degradation/assimilation/utilization</b>           |                                                                                       |         |          |            |          |            |           |
| HD1857                                                | <i>ulaD</i> , 3-keto-L-gulonate-6-phosphate decarboxylase                             | -3.0    | 1.03E-21 | -3.2       | 1.03E-06 | -2.0       | 8.93E-20  |
| <b>DNA replication, recombination, and repair</b>     |                                                                                       |         |          |            |          |            |           |
| HD0908                                                | <i>tnpR</i> , transposon gamma-delta resolvase                                        | -3.0    | 7.43E-19 | -2.5       | 1.39E-04 |            |           |
| <b>Fatty acid biosynthesis</b>                        |                                                                                       |         |          |            |          |            |           |
| HD0181                                                | <i>fabA</i> , 3-hydroxydecanoyl-ACP dehydratase                                       |         |          |            |          | 3.6        | 2.60E-63  |
| <b>Generation of precursor metabolites and energy</b> |                                                                                       |         |          |            |          |            |           |
| HD0003                                                | F0F1 ATP synthase subunit I                                                           | -3.0    | 3.69E-22 | -2.3       | 4.82E-04 | -7.6       | 2.50E-154 |
| HD0004                                                | <i>atpB</i> , ATP synthase F0F1 subunit A                                             | -2.5    | 1.61E-16 | -2.2       | 8.04E-04 | -4.8       | 9.22E-100 |
| HD0005                                                | <i>atpE</i> , ATP synthase F0F1 subunit C                                             | -2.2    | 4.38E-13 |            |          | -4.8       | 1.47E-98  |
| HD0006                                                | <i>atpF</i> , ATP synthase F0F1 subunit B                                             | -2.1    | 1.34E-11 |            |          | -4.6       | 1.55E-94  |
| HD0007                                                | <i>atpH</i> , ATP synthase F0F1 subunit delta                                         | -2.0    | 1.34E-10 |            |          | -4.6       | 1.44E-95  |
| HD0008                                                | <i>atpA</i> , ATP synthase F0F1 subunit alpha                                         |         |          |            |          | -4.1       | 5.00E-85  |
| HD0009                                                | <i>atpG</i> , ATP synthase F0F1 subunit gamma                                         | -2.0    | 1.02E-10 |            |          | -4.4       | 4.38E-91  |
| HD0010                                                | <i>atpD</i> , ATP synthase F0F1 subunit beta                                          |         |          |            |          | -2.9       | 2.10E-49  |

| Gene ID                          | Gene name or homolog                                                      | Mid-log |          | Transition |          | Stationary |           |
|----------------------------------|---------------------------------------------------------------------------|---------|----------|------------|----------|------------|-----------|
|                                  |                                                                           | Fold    | P-value  | Fold       | P-value  | Fold       | P-value   |
| HD0011                           | <i>atpC</i> , ATP synthase F0F1 subunit epsilon                           |         |          |            |          | -2.0       | 1.58E-20  |
| <b>Anaerobic respiration</b>     |                                                                           |         |          |            |          |            |           |
| HD0084                           | <i>lldD</i> , L-lactate dehydrogenase                                     | -5.9    | 1.57E-53 | -4.3       | 1.04E-09 | -9.8       | 4.74E-196 |
| HD0261                           | NAD-dependent epimerase/dehydratase family protein                        |         |          |            |          | 2.2        | 4.08E-28  |
| HD0344                           | <i>nrfA</i> , cytochrome c552                                             | -3.4    | 6.41E-27 | -3.0       | 2.34E-06 | -2.2       | 3.33E-24  |
| HD0347                           | <i>nrfB</i> , cytochrome c nitrite reductase                              | -3.1    | 5.99E-22 | -3.1       | 1.40E-06 | -2.0       | 5.76E-17  |
| HD0349                           | <i>nrfC</i> , nitrate reductase, Fe-S protein                             | -2.8    | 1.15E-18 | -2.6       | 5.11E-05 |            |           |
| HD0350                           | <i>nrfD</i> , nitrate reductase, transmembrane protein                    | -2.2    | 3.16E-12 |            |          |            |           |
| HD0589                           | Beta-propeller domain of methanol dehydrogenase                           | -2.5    | 7.73E-16 | -2.4       | 2.01E-04 |            |           |
| HD1110                           | <i>fdhE</i> , formate dehydrogenase accessory protein FdhE                | 4.1     | 6.38E-36 | 2.9        | 5.07E-06 | 3.1        | 7.78E-55  |
| HD1393                           | <i>torY</i> , cytochrome c-type protein TorY                              | -2.7    | 1.17E-18 | -2.7       | 2.54E-05 | -2.7       | 6.28E-41  |
| HD1394                           | <i>torZ</i> , TMAO reductase 2                                            | -2.6    | 1.23E-18 | -2.5       | 1.09E-04 | -2.5       | 4.61E-37  |
| HD1456                           | <i>ackA</i> , acetate kinase                                              |         |          |            |          | -2.4       | 1.10E-33  |
| HD1815                           | Dissimilatory sulfite reductase                                           | 3.3     | 6.93E-25 | 2.4        | 1.38E-04 |            |           |
| HD1986                           | <i>fumC</i> , fumarate hydratase                                          | -2.2    | 4.15E-13 |            |          | -3.6       | 7.75E-70  |
| <b>Hypothetical proteins</b>     |                                                                           |         |          |            |          |            |           |
| HD0055                           | Hypothetical protein                                                      | 2.0     | 2.62E-05 | 2.1        | 3.24E-03 |            |           |
| HD0083                           | Hypothetical protein                                                      |         |          | -2.2       | 1.24E-03 |            |           |
| HD0101                           | Hypothetical protein                                                      | 2.3     | 5.35E-06 |            |          |            |           |
| HD0104                           | Hypothetical protein                                                      |         |          | 2.1        | 4.75E-03 |            |           |
| HD0106                           | Hypothetical protein                                                      | 2.7     | 1.07E-04 |            |          |            |           |
| HD0180                           | Hypothetical protein                                                      |         |          |            |          | 2.4        | 1.34E-22  |
| HD0286                           | Hypothetical protein                                                      | 3.2     | 2.36E-25 | 2.8        | 1.56E-05 |            |           |
| HD0352                           | Hypothetical protein                                                      |         |          |            |          | 2.1        | 1.79E-06  |
| HD0590                           | Conserved hypothetical protein                                            | -2.3    | 1.27E-13 | -2.1       | 1.88E-03 |            |           |
| HD0805                           | Conserved hypothetical protein                                            | -7.5    | 1.08E-66 | -6.5       | 1.68E-14 | -7.6       | 3.24E-158 |
| HD0909                           | Hypothetical protein                                                      | -2.1    | 8.79E-11 |            |          | -2.0       | 1.86E-21  |
| HD0953                           | Hypothetical protein                                                      | 2.3     | 3.23E-14 |            |          |            |           |
| HD1000                           | Hypothetical protein                                                      |         |          |            |          | 2.5        | 1.01E-21  |
| HD1060                           | Hypothetical protein                                                      | 2.1     | 4.26E-12 | 2.0        | 2.12E-03 |            |           |
| HD1151                           | Hypothetical protein                                                      | -3.5    | 5.24E-20 | -2.2       | 1.65E-03 | -3.1       | 4.57E-16  |
| HD1252                           | Hypothetical protein                                                      | -2.3    | 1.31E-09 |            |          | -2.7       | 1.13E-11  |
| HD1313                           | Hypothetical protein                                                      | -3.2    | 7.64E-16 | -2.6       | 1.42E-04 | -7.4       | 3.08E-81  |
| HD1314                           | Hypothetical protein                                                      |         |          |            |          | 3.4        | 7.48E-11  |
| HD1432                           | Hypothetical protein                                                      | -4.7    | 1.88E-41 | -3.6       | 8.14E-08 | -8.6       | 1.00E-170 |
| HD1434                           | Hypothetical protein                                                      | 4.5     | 6.30E-40 | 3.1        | 1.95E-06 | 11.2       | 1.65E-202 |
| HD1439                           | Hypothetical protein                                                      | -2.5    | 4.91E-16 | -2.4       | 2.36E-04 | -2.6       | 1.03E-38  |
| HD1449                           | Hypothetical protein                                                      | 2.1     | 1.78E-10 | 2.1        | 1.61E-03 |            |           |
| HD1502                           | Hypothetical protein                                                      | -2.9    | 5.48E-15 | -3.2       | 1.78E-06 |            |           |
| HD1515                           | Hypothetical protein                                                      |         |          |            |          | -2.8       | 2.21E-39  |
| HD1522                           | Hypothetical protein                                                      | -2.7    | 1.33E-03 |            |          |            |           |
| HD1523                           | Hypothetical protein                                                      | -2.5    | 1.27E-02 |            |          |            |           |
| HD1640                           | Hypothetical protein                                                      | 5.6     | 4.30E-51 | 5.9        | 2.82E-13 | 9.9        | 4.20E-196 |
| HD1899                           | <i>slyX</i> , SlyX family protein                                         | -4.5    | 1.12E-39 | -3.0       | 2.52E-06 | -9.9       | 2.36E-188 |
| HD2037                           | Conserved hypothetical protein                                            | -2.2    | 4.12E-12 |            |          | -2.1       | 3.56E-22  |
| <b>Lipid biosynthesis</b>        |                                                                           |         |          |            |          |            |           |
| HD1253                           | <i>dggA</i> , diacylglycerol kinase                                       | -2.0    | 4.06E-09 |            |          |            |           |
| <b>Membrane transport/uptake</b> |                                                                           |         |          |            |          |            |           |
| HD0025                           | <i>dcuBI</i> , anaerobic C4-dicarboxylate transporter                     | 4.5     | 3.11E-40 | 2.5        | 1.04E-04 | 2.5        | 9.61E-37  |
| HD0312                           | <i>dppB</i> , dipeptide transport system permease                         |         |          | 2.0        | 2.11E-03 | 2.0        | 2.89E-18  |
| HD0313                           | <i>dppC</i> , dipeptide transport system permease                         | 2.1     | 2.38E-10 |            |          |            |           |
| HD0614                           | <i>kefB</i> , glutathione-regulated K <sup>+</sup> -efflux system protein |         |          |            |          | 2.6        | 2.19E-40  |
| HD0766                           | <i>manZ</i> , PTS system mannose-specific transporter subunit subunit IID |         |          |            |          | 2.0        | 1.55E-21  |
| HD0770                           | HlyC/CorC family transporter with CBS domain                              |         |          | -2.1       | 1.33E-03 |            |           |
| HD0790                           | <i>ccmD</i> , heme exporter protein D                                     |         |          |            |          | -2.2       | 1.24E-11  |
| HD1018                           | <i>macA</i> , macrolide-specific efflux protein                           | -2.8    | 2.01E-20 |            |          |            |           |

| Gene ID                                     | Gene name or homolog                                                           | Mid-log |           | Transition |          | Stationary |           |
|---------------------------------------------|--------------------------------------------------------------------------------|---------|-----------|------------|----------|------------|-----------|
|                                             |                                                                                | Fold    | P-value   | Fold       | P-value  | Fold       | P-value   |
| HD1019                                      | <i>macB</i> , macrolide-specific ABC-type efflux carrier                       | -2.1    | 1.55E-11  |            |          |            |           |
| HD1074                                      | <i>potD2</i> , spermidine/putrescine-binding protein                           | 2.9     | 2.21E-21  | 2.3        | 2.44E-04 | 2.2        | 4.51E-30  |
| HD1109                                      | Oxalate/formate antiporter                                                     | 9.9     | 8.56E-84  | 6.9        | 2.51E-15 | 7.6        | 3.38E-159 |
| HD1146                                      | <i>glpF</i> , glycerol uptake facilitator protein                              | 4.5     | 5.29E-39  | 2.0        | 2.11E-03 | 3.3        | 2.39E-53  |
| HD1150                                      | <i>glpT</i> , glycerol 3-phosphate transporter                                 | -2.4    | 1.20E-14  | -2.4       | 2.06E-04 |            |           |
| HD1512                                      | acriflavine resistance protein                                                 | 2.2     | 7.34E-13  |            |          |            |           |
| HD1639                                      | Major facilitator superfamily transporter                                      | 2.0     | 8.29E-11  |            |          | 4.7        | 3.10E-99  |
| HD1814                                      | Transporter/inner membrane protein YccA                                        | 3.3     | 5.19E-27  | 3.7        | 4.31E-08 |            |           |
| HD1859                                      | PTS system enzyme II-A permease                                                | -3.5    | 1.37E-26  | -3.5       | 1.58E-07 | -3.3       | 1.13E-46  |
| HD1860                                      | <i>ulaA</i> , PTS system ascorbate-specific transporter subunits subunits IICB | -2.8    | 3.14E-20  | -3.2       | 9.04E-07 |            |           |
| <b>Nucleoside and nucleotide metabolism</b> |                                                                                |         |           |            |          |            |           |
| HD0888                                      | <i>deoC</i> , deoxyribose-phosphate aldolase                                   |         |           |            |          | 2.6        | 2.15E-40  |
| HD0889                                      | <i>deoD</i> , purine nucleoside phosphorylase                                  |         |           |            |          | 2.5        | 4.58E-36  |
| HD1029                                      | Nucleotidase                                                                   | -2.0    | 2.38E-10  |            |          | -5.9       | 1.64E-125 |
| HD1424                                      | <i>purD</i> , phosphoribosylaminoimidazole carboxylase                         | 2.1     | 1.96E-11  |            |          |            |           |
| HD1503                                      | <i>guaB</i> , inosine 5'-monophosphate dehydrogenase                           | -2.4    | 1.76E-15  | -2.6       | 3.49E-05 |            |           |
| <b>Phage-associated proteins</b>            |                                                                                |         |           |            |          |            |           |
| HD0111                                      | Mu-like phage C protein                                                        |         |           |            |          | 2.0        | 4.46E-12  |
| HD1533                                      | Phage related DNA-binding protein                                              |         |           | -2.8       | 7.47E-04 |            |           |
| <b>Protein folding and degradation</b>      |                                                                                |         |           |            |          |            |           |
| HD1900                                      | <i>fkpA</i> , FKBP-type peptidylprolyl isomerase                               | -2.5    | 3.06E-16  | -2.1       | 1.19E-03 | -4.4       | 9.11E-93  |
| <b>Regulation and cell signaling</b>        |                                                                                |         |           |            |          |            |           |
| HD0262                                      | <i>argR</i> , arginine repressor ArgR                                          | 2.3     | 8.91E-13  |            |          | 3.4        | 2.54E-56  |
| HD0280                                      | Putative GrlR family protein                                                   | 13.8    | 3.27E-101 | 16.7       | 2.05E-27 | 8.8        | 3.32E-152 |
| HD0449                                      | <i>fis</i> , DNA-binding protein Fis                                           |         |           |            |          | -2.4       | 1.31E-31  |
| HD0591                                      | LemA protein; GacS homolog                                                     | -3.5    | 5.92E-29  | -2.9       | 4.84E-06 | -2.5       | 2.94E-35  |
| HD0665                                      | LysM domain/BON superfamily protein                                            | 2.0     | 8.17E-11  | 2.0        | 2.48E-03 | 2.5        | 7.09E-38  |
| HD0738                                      | <i>crp</i> , cAMP-regulatory protein                                           | 2.2     | 9.03E-13  | 2.1        | 1.00E-03 | 3.2        | 1.28E-58  |
| HD0910                                      | <i>hicB</i> , HicB protein                                                     |         |           |            |          | -2.3       | 3.54E-32  |
| HD0911                                      | <i>hicA</i> , HicA protein                                                     |         |           |            |          | -2.2       | 1.20E-27  |
| HD1028                                      | <i>gcvA</i> , DNA-binding transcriptional activator GcvA                       | -2.1    | 8.59E-12  |            |          | -7.1       | 6.51E-150 |
| HD1096                                      | DNA-binding helix-turn-helix protein                                           | -2.7    | 1.58E-16  |            |          | -3.0       | 3.16E-40  |
| HD1641                                      | <i>purR</i> , DNA-binding transcriptional repressor PurR                       | -2.1    | 7.42E-11  |            |          | -2.8       | 1.11E-43  |
| <b>Stress survival</b>                      |                                                                                |         |           |            |          |            |           |
| HD0848                                      | <i>sodC</i> , superoxide dismutase (Cu-Zn)                                     |         |           |            |          | -2.8       | 2.79E-45  |
| HD1366                                      | <i>cspC</i> , cold shock-like protein CspC                                     |         |           | 2.6        | 4.56E-05 |            |           |
| HD1366                                      | <i>cspD</i> , cold shock-like protein CspD                                     | 2.1     | 5.66E-11  |            |          |            |           |
| HD1667                                      | <i>bcp</i> , thioredoxin-dependent thiol peroxidase                            | -2.0    | 1.65E-10  |            |          | -3.0       | 6.66E-50  |
| HD1754                                      | <i>ftnA</i> , ferritin                                                         |         |           |            |          | -2.1       | 7.13E-26  |
| HD1784                                      | <i>groEL</i> , molecular chaperone GroEL                                       | 2.6     | 1.41E-17  |            |          |            |           |
| HD1785                                      | <i>groES</i> , co-chaperonin GroES                                             | 2.6     | 1.32E-17  |            |          |            |           |
| <b>Translation</b>                          |                                                                                |         |           |            |          |            |           |
| HD0226                                      | <i>miaB</i> , (dimethylallyl)adenosine tRNA methylthiotransferase              |         |           |            |          | -2.3       | 3.60E-29  |
| HD0319                                      | <i>rlmN</i> , rRNA large subunit methyltransferase N                           |         |           |            |          | -7.5       | 5.12E-156 |
| HD0448                                      | <i>dusB</i> , tRNA-dihydrouridine synthase B                                   |         |           |            |          | -2.9       | 1.91E-47  |
| HD1257                                      | <i>queA</i> , S-adenosylmethionine:tRNA ribosyltransferase-isomerase           |         |           |            |          | -4.6       | 6.49E-92  |
| HD1407                                      | <i>efp</i> , elongation factor P                                               |         |           |            |          | -2.3       | 5.54E-32  |
| HD1664                                      | tRNA/rRNA methyltransferase                                                    |         |           |            |          | -2.2       | 3.71E-26  |
| HD1665                                      | <i>queF</i> , 7-cyano-7-deazaguanine reductase                                 |         |           |            |          | -5.3       | 4.66E-112 |

42 NS indicates genes that are statistically not significant in the stationary growth phase but 25-fold or higher differentially expressed and statistically significant in mid-  
43 log and/or transition growth phases.

44



45 TABLE S4. Individual genes differentially expressed in 35000HPΔ*cpxA* compared to 35000HP  
 46 at different phases of growth classified based on their functional categories.

| Gene ID                                                | Gene name or homolog                                           | Mid-log |          | Transition |          | Stationary |           |
|--------------------------------------------------------|----------------------------------------------------------------|---------|----------|------------|----------|------------|-----------|
|                                                        |                                                                | Fold    | P-value  | Fold       | P-value  | Fold       | P-value   |
| <b>Amino acid biosynthesis</b>                         |                                                                |         |          |            |          |            |           |
| HD0890                                                 | <i>argC</i> , N-acetyl-gamma-glutamyl-phosphate reductase      |         |          |            |          | 2.1        | 3.85E-17  |
| HD0891                                                 | <i>argB</i> , acetylglutamate kinase                           |         |          |            |          | 2.1        | 8.01E-17  |
| HD0896                                                 | <i>cysK</i> , O-acetylserine sulfhydrylase                     | -5.6    | 4.65E-26 | -5.2       | 1.16E-12 | -5.7       | 1.60E-89  |
| <b>Cell surface structures and associated proteins</b> |                                                                |         |          |            |          |            |           |
| HD0653                                                 | <i>waaF</i> , ADP-heptose-LPS heptosyltransferase II           |         |          |            |          | -2.3       | 7.81E-24  |
| HD1666                                                 | D,D-heptose 1,7-bisphosphate phosphatase                       | -2.1    | 2.57E-06 |            |          | -3.6       | 1.30E-51  |
| <b>Outer membrane proteins</b>                         |                                                                |         |          |            |          |            |           |
| HD0045                                                 | <i>momp</i> , major outer membrane protein                     |         |          |            |          | 7.2        | 1.69E-114 |
| HD0046                                                 | <i>ompA2</i> , major outer membrane protein, OmpA2             | -12.4   | 3.91E-49 | -8.1       | 1.39E-18 | -25.6      | 1.14E-259 |
| HD0047                                                 | No known homolog                                               | -4.0    | 1.17E-09 | -4.4       | 1.73E-09 | -7.5       | 2.57E-36  |
| HD0048                                                 | No known homolog                                               | -2.0    | 1.69E-04 | -2.7       | 2.50E-05 | -3.8       | 3.94E-26  |
| HD0646                                                 | Outer membrane receptor protein, iron transport                | -2.4    | 2.27E-08 |            |          |            |           |
| HD0651                                                 | <i>oapA</i> , opacity associated protein A                     |         |          |            |          | -2.2       | 6.70E-23  |
| HD0652                                                 | <i>oapB</i> , opacity associated protein B                     |         |          |            |          | -2.0       | 5.09E-17  |
| HD0746                                                 | <i>dltA</i> , Endo-1,4-beta-xylanase A                         |         |          |            |          | -2.8       | 1.83E-35  |
| HD0769                                                 | <i>dsrA</i> , serum resistance protein DsrA                    | -18.0   | 4.46E-61 | -12.5      | 5.41E-25 | -27.4      | 3.17E-268 |
| HD1017                                                 | 24 kDa outer membrane protein; MipA protein                    | -2.3    | 4.88E-07 |            |          | -3.9       | 1.08E-50  |
| HD1078                                                 | <i>ompP1</i> , outer membrane protein P1                       |         |          |            |          | -2.7       | 5.89E-33  |
| HD1155                                                 | <i>lspB</i> , large supernatant protein exporter               | -3.8    | 6.44E-16 | -2.0       | 1.64E-03 | -15.4      | 2.46E-171 |
| HD1278                                                 | Serine protease                                                | -2.6    | 6.82E-10 | -2.2       | 3.22E-04 | -3.0       | 1.76E-38  |
| HD1280                                                 | Serine protease-like protein                                   | -2.6    | 2.40E-09 |            |          | -2.4       | 4.69E-27  |
| HD1326                                                 | <i>hhdB</i> , hemolysin activation/secretion protein           | -5.3    | 1.78E-24 | -3.6       | 2.06E-08 | -16.9      | 3.97E-190 |
| HD1327                                                 | <i>hhdA</i> , hemolysin                                        | -2.5    | 1.10E-08 | -2.0       | 1.32E-03 | -2.4       | 2.35E-26  |
| HD1433                                                 | <i>ompP2A</i> , outer membrane protein P2-like protein         | -8.8    | 2.17E-38 | -5.8       | 6.06E-14 | -11.2      | 2.17E-160 |
| HD1435                                                 | <i>ompP2B</i> , outer membrane protein P2-like protein         | 5.0     | 1.73E-23 | 3.3        | 1.76E-07 | 15.9       | 4.02E-202 |
| HD1856                                                 | Possible outer membrane protein                                | -6.5    | 1.03E-29 | -4.6       | 2.98E-11 | -5.5       | 2.34E-83  |
| HD1920                                                 | <i>ncaA</i> , NcaA class II                                    | -6.0    | 4.56E-28 | -3.7       | 6.90E-09 | -7.2       | 4.97E-114 |
| HD2025                                                 | <i>hgbA</i> , hemoglobin-binding protein HgbA                  | -2.5    | 3.67E-09 | -2.2       | 4.07E-04 | -2.6       | 3.34E-31  |
| <b>Type I fimbriae</b>                                 |                                                                |         |          |            |          |            |           |
| HD0281                                                 | <i>fimA</i> , fimbrial major pilin protein                     | 8.9     | 5.45E-39 | 8.7        | 1.54E-19 | 9.9        | 3.29E-144 |
| HD0282                                                 | <i>fimB</i> , fimbrial structural subunit                      | 4.7     | 1.03E-21 | 4.6        | 2.66E-11 | 3.1        | 2.01E-38  |
| HD0283                                                 | <i>fimC</i> , fimbrial outer membrane usher protein            | 2.6     | 1.11E-09 | 2.1        | 7.36E-04 | 2.4        | 1.04E-25  |
| HD0284                                                 | <i>fimD</i> , periplasmic fimbrial chaperone                   | 3.1     | 5.07E-13 | 2.2        | 5.86E-04 |            |           |
| HD0285                                                 | Minor fimbrial subunit                                         | 3.0     | 3.31E-12 | 2.3        | 1.44E-04 | 2.1        | 4.45E-17  |
| <b>Type IVa pili/type II secretion/competence</b>      |                                                                |         |          |            |          |            |           |
| HD0182                                                 | Prepilin peptidase dependent protein A                         |         |          |            |          | -2.2       | 1.02E-16  |
| HD0183                                                 | Prepilin peptidase dependent protein B                         |         |          |            |          | -2.3       | 7.18E-18  |
| HD0428                                                 | Tfp pilus assembly protein ComA                                |         |          |            |          | -2.0       | 5.90E-10  |
| HD0433                                                 | Pilus assembly protein PilT/ComD                               |         |          |            |          | -2.0       | 9.21E-11  |
| HD1123                                                 | Prepilin peptidase dependent protein D                         |         |          |            |          | -4.3       | 1.45E-41  |
| HD1124                                                 | <i>hofB</i> , protein transport protein, pili/fimbrial protein |         |          |            |          | -2.6       | 6.27E-28  |
| HD1921                                                 | <i>recG</i> , ATP-dependent DNA helicase RecG                  | -2.1    | 1.47E-06 |            |          | -2.3       | 9.34E-23  |
| HD1985                                                 | DNA transformation protein, T(foX)/Sxy                         | -3.4    | 1.79E-14 | -2.8       | 4.35E-06 | -6.6       | 1.08E-100 |
| <b>Flp pili and associated proteins</b>                |                                                                |         |          |            |          |            |           |
| HD1298                                                 | <i>tadG</i> , tight adherence protein G                        | -2.1    | 1.44E-06 |            |          | -2.1       | 1.83E-19  |
| HD1299                                                 | <i>tadF</i> , tight adherence protein F                        | -2.5    | 1.04E-08 | -2.0       | 1.93E-03 | -2.7       | 3.16E-31  |
| HD1300                                                 | <i>tadE</i> , tight adherence protein E                        | -2.3    | 8.50E-08 |            |          | -2.5       | 2.90E-25  |
| HD1301                                                 | <i>tadD</i> , tight adherence protein D                        | -2.8    | 1.18E-10 |            |          | -4.8       | 7.49E-75  |
| HD1302                                                 | <i>tadC</i> , tight adherence protein C                        | -3.1    | 1.25E-12 | -2.1       | 1.22E-03 | -5.2       | 2.08E-80  |
| HD1303                                                 | <i>tadB</i> , tight adherence protein B                        | -2.8    | 9.05E-11 |            |          | -6.9       | 1.04E-104 |
| HD1304                                                 | <i>tadA</i> , tight adherence protein A                        | -2.5    | 5.48E-09 |            |          | -6.9       | 8.87E-109 |
| HD1305                                                 | <i>flp</i> operon protein D                                    | -2.5    | 9.74E-09 |            |          | -7.3       | 1.02E-113 |
| HD1306                                                 | <i>rcpB</i> , rough colony protein B                           | -2.7    | 6.47E-10 | -2.1       | 9.11E-04 | -10.3      | 8.06E-147 |
| HD1307                                                 | <i>rcpA</i> , rough colony protein A                           | -2.5    | 3.42E-09 | -2.2       | 4.11E-04 | -8.0       | 2.74E-123 |

| Gene ID                                               | Gene name or homolog                                       | Mid-log |          | Transition |          | Stationary |           |
|-------------------------------------------------------|------------------------------------------------------------|---------|----------|------------|----------|------------|-----------|
|                                                       |                                                            | Fold    | P-value  | Fold       | P-value  | Fold       | P-value   |
| HD1308                                                | <i>flp</i> operon protein C                                | -2.8    | 7.19E-11 | -2.4       | 1.17E-04 | -9.3       | 4.16E-139 |
| HD1309                                                | <i>flp</i> operon protein B                                | -4.6    | 7.34E-21 | -2.8       | 4.43E-06 | -21.8      | 2.19E-235 |
| HD1310                                                | <i>flp3</i> , <i>flp</i> operon protein Flp3               | -5.1    | 3.57E-23 | -2.8       | 4.51E-06 | -32.9      | 5.37E-287 |
| HD1311                                                | <i>flp2</i> , <i>flp</i> operon protein Flp2               | -4.0    | 3.12E-17 | -2.6       | 1.64E-05 | -28.3      | 2.27E-248 |
| HD1312                                                | <i>flp1</i> , <i>flp</i> operon protein Flp1               | -4.1    | 1.30E-17 | -2.6       | 2.65E-05 | -31.3      | 7.18E-256 |
| <b>Cofactor biosynthesis</b>                          |                                                            |         |          |            |          |            |           |
| HD1389                                                | <i>moaE</i> , molybdopterin converting factor subunit 2    | -2.3    | 1.25E-07 | -2.5       | 6.38E-05 | -2.4       | 3.47E-24  |
| HD1390                                                | <i>moaD</i> , molybdopterin synthase small subunit         | -2.7    | 1.33E-09 | -2.3       | 1.50E-04 | -2.5       | 1.11E-23  |
| HD1391                                                | <i>moaC</i> , molybdenum cofactor biosynthesis protein C   | -2.7    | 1.03E-09 | -2.5       | 4.33E-05 | -2.8       | 1.38E-31  |
| HD1392                                                | <i>moaA</i> , molybdenum cofactor biosynthesis protein A   | -2.5    | 9.82E-09 | -2.1       | 7.85E-04 | -3.2       | 9.72E-43  |
| HD1495                                                | Putative dithiobiotin synthetase                           | -2.3    | 1.54E-07 |            |          | -2.4       | 1.66E-23  |
| <b>Degradation/assimilation/utilization</b>           |                                                            |         |          |            |          |            |           |
| HD1857                                                | <i>ulaD</i> , 3-keto-L-gulonate-6-phosphate decarboxylase  | -2.8    | 8.64E-11 | -2.9       | 3.07E-06 |            |           |
| <b>DNA replication, recombination, and repair</b>     |                                                            |         |          |            |          |            |           |
| HD0908                                                | <i>tnpR</i> , transposon gamma-delta resolvase             | -2.0    | 1.75E-05 |            |          |            |           |
| <b>Fatty acid biosynthesis</b>                        |                                                            |         |          |            |          |            |           |
| HD0181                                                | <i>fabA</i> , 3-hydroxydecanoyl-ACP dehydratase            |         |          |            |          | 2.3        | 1.61E-22  |
| <b>Generation of precursor metabolites and energy</b> |                                                            |         |          |            |          |            |           |
| HD0003                                                | F0F1 ATP synthase subunit I                                | -2.1    | 5.02E-06 |            |          | -6.5       | 1.48E-101 |
| HD0004                                                | <i>atpB</i> , ATP synthase F0F1 subunit A                  |         |          |            |          | -3.9       | 1.21E-57  |
| HD0005                                                | <i>atpE</i> , ATP synthase F0F1 subunit C                  |         |          |            |          | -3.6       | 1.29E-50  |
| HD0006                                                | <i>atpF</i> , ATP synthase F0F1 subunit B                  | -2.0    | 7.95E-06 |            |          | -3.4       | 3.58E-48  |
| HD0007                                                | <i>atpH</i> , ATP synthase F0F1 subunit delta              |         |          |            |          | -3.4       | 1.67E-46  |
| HD0008                                                | <i>atpA</i> , ATP synthase F0F1 subunit alpha              |         |          |            |          | -2.9       | 3.83E-38  |
| HD0009                                                | <i>atpG</i> , ATP synthase F0F1 subunit gamma              |         |          |            |          | -2.9       | 3.35E-37  |
| <b>Anaerobic respiration</b>                          |                                                            |         |          |            |          |            |           |
| HD0084                                                | <i>lldD</i> , L-lactate dehydrogenase                      | -9.5    | 6.46E-41 | -7.8       | 4.59E-18 | -11.6      | 1.58E-165 |
| HD0261                                                | NAD-dependent epimerase/dehydratase family protein         |         |          |            |          | 2.0        | 8.73E-18  |
| HD0344                                                | <i>nrfA</i> , cytochrome c552                              | -2.3    | 1.47E-07 | -2.4       | 1.21E-04 | -2.7       | 9.42E-30  |
| HD0347                                                | <i>nrfB</i> , cytochrome c nitrite reductase               | -2.1    | 4.72E-06 | -2.5       | 6.40E-05 | -2.4       | 2.89E-19  |
| HD0349                                                | <i>nrfC</i> , nitrate reductase, Fe-S protein              | -2.0    | 8.76E-06 | -2.2       | 5.11E-04 |            |           |
| HD0589                                                | Beta-propeller domain of methanol dehydrogenase            | -2.8    | 1.94E-10 | -2.2       | 5.08E-04 |            |           |
| HD1110                                                | <i>fdhE</i> , formate dehydrogenase accessory protein FdhE | 3.3     | 5.44E-14 | 2.5        | 3.29E-05 | 3.8        | 1.73E-56  |
| HD1393                                                | <i>torY</i> , cytochrome c-type protein TorY               | -2.2    | 7.22E-07 | -2.3       | 1.58E-04 | -2.4       | 1.18E-24  |
| HD1394                                                | <i>torZ</i> , TMAO reductase 2                             |         |          | -2.2       | 3.47E-04 | -2.0       | 6.33E-18  |
| HD1986                                                | <i>fumC</i> , fumarate hydratase                           |         |          |            |          | -3.0       | 1.14E-39  |
| <b>Hypothetical proteins</b>                          |                                                            |         |          |            |          |            |           |
| HD0099                                                | Hypothetical protein                                       |         |          |            |          | 2.5        | 3.36E-02  |
| HD0149                                                | Hypothetical protein                                       |         |          |            |          | 2.2        | 2.47E-03  |
| HD0286                                                | Hypothetical protein                                       | 2.6     | 2.74E-09 | 2.2        | 5.27E-04 |            |           |
| HD0590                                                | Conserved hypothetical protein                             | -2.5    | 1.07E-08 |            |          |            |           |
| HD0805                                                | Conserved hypothetical protein                             | -6.1    | 1.98E-28 | -4.3       | 2.24E-10 | -6.7       | 3.36E-106 |
| HD0909                                                | Hypothetical protein                                       |         |          |            |          | -2.1       | 1.12E-17  |
| HD1060                                                | Hypothetical protein                                       |         |          |            |          | -2.4       | 4.21E-27  |
| HD1151                                                | Hypothetical protein                                       | -2.3    | 2.65E-06 | -2.8       | 6.35E-06 | -2.1       | 4.07E-06  |
| HD1252                                                | Hypothetical protein                                       |         |          |            |          | -2.3       | 1.11E-06  |
| HD1313                                                | Hypothetical protein                                       | -2.1    | 4.05E-05 | -2.1       | 2.31E-03 | -6.3       | 2.91E-55  |
| HD1314                                                | Hypothetical protein                                       |         |          |            |          | 6.7        | 2.26E-11  |
| HD1316                                                | <i>sana</i> , SanA protein                                 |         |          |            |          | 2.5        | 1.64E-08  |
| HD1409                                                | Hypothetical protein                                       |         |          |            |          | -2.2       | 2.96E-21  |
| HD1432                                                | Hypothetical protein                                       | -3.5    | 6.60E-15 | -2.8       | 6.50E-06 | -8.9       | 2.45E-132 |
| HD1434                                                | Hypothetical protein                                       | 4.1     | 1.97E-18 | 2.9        | 3.14E-06 | 14.3       | 7.80E-169 |
| HD1471                                                | Hypothetical protein                                       |         |          |            |          | -2.0       | 6.90E-15  |
| HD1502                                                | Hypothetical protein                                       |         |          | -2.1       | 1.22E-03 | -2.1       | 2.29E-13  |
| HD1515                                                | Hypothetical protein                                       |         |          |            |          | -2.6       | 1.81E-26  |
| HD1526                                                | Hypothetical protein                                       |         |          | -2.4       | 4.69E-04 |            |           |
| HD1534                                                | Hypothetical protein                                       |         |          | -2.8       | 3.27E-04 |            |           |
| HD1537                                                | Hypothetical protein                                       |         |          |            |          | -2.7       | 2.24E-07  |

| Gene ID                                     | Gene name or homolog                                                      | Mid-log |          | Transition |          | Stationary |           |
|---------------------------------------------|---------------------------------------------------------------------------|---------|----------|------------|----------|------------|-----------|
|                                             |                                                                           | Fold    | P-value  | Fold       | P-value  | Fold       | P-value   |
| HD1577                                      | Hypothetical protein                                                      |         |          |            |          | 6.4        | 3.54E-04  |
| HD1640                                      | Hypothetical protein                                                      | 4.4     | 3.87E-20 | 3.9        | 2.04E-09 | 7.8        | 2.78E-122 |
| HD1899                                      | <i>slyX</i> , SlyX family protein                                         | -4.0    | 1.21E-17 | -2.8       | 4.57E-06 | -8.4       | 5.94E-125 |
| <b>Lipid biosynthesis</b>                   |                                                                           |         |          |            |          |            |           |
| HD1253                                      | <i>dgkA</i> , diacylglycerol kinase                                       | -2.0    | 1.78E-05 |            |          | -2.0       | 1.95E-12  |
| <b>Membrane transport/uptake</b>            |                                                                           |         |          |            |          |            |           |
| HD0025                                      | <i>dcuB1</i> , anaerobic C4-dicarboxylate transporter                     | 2.1     | 2.07E-06 |            |          |            |           |
| HD0313                                      | <i>dppB</i> , dipeptide transport system permease                         |         |          |            |          | 2.3        | 3.16E-19  |
| HD0489                                      | Putative sulfate transport protein CysZ                                   | 2.3     | 3.76E-03 |            |          |            |           |
| HD0766                                      | <i>manZ</i> , PTS system mannose-specific transporter subunit II          |         |          |            |          | 2.3        | 7.25E-21  |
| HD0767                                      | <i>manY</i> , mannose-specific PTS system IIC component                   |         |          |            |          | 2.0        | 2.00E-16  |
| HD0768                                      | <i>manX</i> , mannose-specific phosphotransferase IIAB                    |         |          |            |          | 2.1        | 5.03E-18  |
| HD1018                                      | <i>macA</i> , macrolide-specific efflux protein                           | -2.0    | 8.26E-06 |            |          |            |           |
| HD1109                                      | Oxalate/formate antiporter                                                | 6.9     | 6.84E-32 | 4.4        | 1.34E-10 | 7.9        | 6.49E-124 |
| HD1146                                      | <i>glpF</i> , glycerol uptake facilitator protein                         | 3.2     | 1.69E-13 |            |          | 3.0        | 2.88E-35  |
| HD1150                                      | <i>glpT</i> , glycerol 3-phosphate transporter                            | -2.0    | 5.15E-06 | -2.7       | 1.03E-05 |            |           |
| HD1639                                      | Major facilitator superfamily transporter                                 | 2.1     | 2.60E-06 |            |          | 5.3        | 5.76E-86  |
| HD1859                                      | PTS system enzyme II-A permease                                           | -3.1    | 3.13E-12 | -3.2       | 3.69E-07 | -2.8       | 1.97E-27  |
| HD1860                                      | <i>ulaA</i> , PTS system ascorbate-specific transporter subunits IICB     | -2.3    | 1.19E-07 | -2.9       | 2.48E-06 |            |           |
| HD0614                                      | <i>kefB</i> , glutathione-regulated K <sup>+</sup> -efflux system protein |         |          |            |          | 2.5        | 6.36E-28  |
| <b>Nucleoside and nucleotide metabolism</b> |                                                                           |         |          |            |          |            |           |
| HD0888                                      | <i>deoC</i> , deoxyribose-phosphate aldolase                              |         |          |            |          | 2.5        | 7.40E-27  |
| HD0889                                      | <i>deoD</i> , purine nucleoside phosphorylase                             |         |          |            |          | 2.3        | 1.43E-22  |
| HD1029                                      | nucleotidase                                                              | -2.5    | 5.42E-09 |            |          | -4.3       | 5.15E-67  |
| <b>Phage-associated proteins</b>            |                                                                           |         |          |            |          |            |           |
| HD1525                                      | <i>gam</i> , mu-phage host-nuclease inhibitor protein                     |         |          | -2.6       | 9.84E-05 |            |           |
| HD1530                                      | Putative phage-associated protein                                         |         |          | -2.2       | 1.12E-03 |            |           |
| HD1532                                      | Putative phage-associated protein                                         |         |          | -2.5       | 9.49E-05 |            |           |
| HD1533                                      | Phage related DNA-binding protein                                         |         |          | -3.5       | 4.35E-06 |            |           |
| HD1538                                      | Putative phage-related DNA-binding protein                                |         |          | -2.2       | 1.46E-03 | -2.6       | 1.61E-09  |
| <b>Protein folding and degradation</b>      |                                                                           |         |          |            |          |            |           |
| HD1900                                      | <i>jkpA</i> , FKBP-type peptidylprolyl isomerase                          | -2.4    | 2.54E-08 |            |          | -3.2       | 7.15E-45  |
| <b>Regulation and cell signaling</b>        |                                                                           |         |          |            |          |            |           |
| HD0262                                      | <i>argR</i> , arginine repressor ArgR                                     | 2.0     | 1.35E-05 |            |          | 3.0        | 3.56E-35  |
| HD0280                                      | Putative GrlR family protein                                              | 9.5     | 5.83E-41 | 9.0        | 4.63E-20 | 8.9        | 1.87E-114 |
| HD0591                                      | LemA protein; GacS homolog                                                | -4.1    | 8.62E-19 | -2.7       | 1.44E-05 | -3.8       | 5.85E-56  |
| HD0738                                      | <i>crp</i> , cAMP-regulatory protein                                      |         |          |            |          | 2.5        | 1.31E-27  |
| HD0910                                      | <i>hicB</i> , HicB protein                                                |         |          |            |          | -2.6       | 3.96E-30  |
| HD0911                                      | <i>hicA</i> , HicA protein                                                |         |          |            |          | -2.6       | 5.99E-31  |
| HD1028                                      | <i>gcvA</i> , DNA-binding transcriptional activator GcvA                  | -2.5    | 5.31E-09 |            |          | -5.1       | 6.74E-82  |
| HD1096                                      | DNA-binding helix-turn-helix protein                                      |         |          |            |          | -2.6       | 8.15E-24  |
| HD1524                                      | Transcriptional activator PerC domain protein                             |         |          | -3.8       | 3.90E-06 |            |           |
| HD1641                                      | <i>purR</i> , DNA-binding transcriptional repressor PurR                  |         |          |            |          | -2.8       | 3.68E-33  |
| <b>Stress survival</b>                      |                                                                           |         |          |            |          |            |           |
| HD0848                                      | <i>sodC</i> , superoxide dismutase (Cu-Zn)                                |         |          |            |          | -2.4       | 8.85E-26  |
| HD1667                                      | <i>bcp</i> , thioredoxin-dependent thiol peroxidase                       |         |          |            |          | -2.3       | 4.80E-24  |
| <b>Translation</b>                          |                                                                           |         |          |            |          |            |           |
| HD0448                                      | <i>dusB</i> , tRNA-dihydrouridine synthase B                              |         |          |            |          | -2.3       | 6.25E-24  |
| HD1665                                      | <i>queF</i> , 7-cyano-7-deazaguanine reductase                            |         |          |            |          | -4.8       | 2.71E-75  |

47  
48  
49  
50

51 TABLE S5. Individual genes differentially expressed in 35000HP $\Delta$ *cpxR* compared to 35000HP  
 52 at different phases of growth classified based on their functional categories

| Gene ID                                                | Gene name or homolog                                                      | Mid-log |          | Transition |          | Stationary |           |
|--------------------------------------------------------|---------------------------------------------------------------------------|---------|----------|------------|----------|------------|-----------|
|                                                        |                                                                           | Fold    | P-value  | Fold       | P-value  | Fold       | P-value   |
| <b>Cell surface structures and associated proteins</b> |                                                                           |         |          |            |          |            |           |
| <u>Lipooligosaccharide biosynthesis</u>                |                                                                           |         |          |            |          |            |           |
| HD0454                                                 | <i>waaA</i> , 3-deoxy-D-manno-octulosonic-acid transferase                |         |          |            |          | -2.1       | 2.84E-25  |
| <u>Outer membrane proteins</u>                         |                                                                           |         |          |            |          |            |           |
| HD0045                                                 | <i>momp</i> , major outer membrane protein                                | -2.1    | 6.38E-08 |            |          | -2.6       | 1.94E-39  |
| HD1155                                                 | <i>lspB</i> , large supernatant protein exporter                          | 2.8     | 6.73E-13 | 2.8        | 7.90E-06 |            |           |
| <u>Type IVa pili/type II secretion/competence</u>      |                                                                           |         |          |            |          |            |           |
| HD0182                                                 | Prepilin peptidase dependent protein A                                    |         |          |            |          | 8.8        | 6.23E-167 |
| HD0183                                                 | Prepilin peptidase dependent protein B                                    |         |          |            |          | 8.5        | 6.18E-163 |
| HD0184                                                 | No known homolog                                                          |         |          |            |          | 5.2        | 6.89E-101 |
| HD0185                                                 | Prepilin peptidase dependent protein C                                    |         |          |            |          | 4.4        | 3.93E-77  |
| HD0209                                                 | <i>comF</i> , competence protein F                                        |         |          |            |          | 2.5        | 3.84E-31  |
| HD0318                                                 | Fimbrial biogenesis and twitching motility protein                        |         |          |            |          | 3.7        | 1.86E-65  |
| HD0427                                                 | <i>comA</i> , competence protein A-like protein                           |         |          |            |          | 5.6        | 2.20E-105 |
| HD0428                                                 | Tfp pilus assembly protein ComA                                           |         |          |            |          | 6.7        | 8.77E-109 |
| HD0429                                                 | No known homolog                                                          |         |          |            |          | 6.7        | 5.81E-64  |
| HD0430                                                 | No known homolog                                                          |         |          |            |          | 7.7        | 2.85E-87  |
| HD0431                                                 | No known homolog                                                          |         |          |            |          | 6.1        | 3.59E-65  |
| HD0432                                                 | No known homolog                                                          |         |          |            |          | 5.5        | 7.94E-92  |
| HD0433                                                 | Pilus assembly protein PilT/ComD                                          |         |          |            |          | 5.5        | 4.03E-89  |
| HD0434                                                 | <i>comE</i> , competence protein E/protein transport protein HofQ         |         |          |            |          | 2.8        | 7.05E-44  |
| HD0650                                                 | DNA uptake protein ComEA/type II secretion protein                        |         |          |            |          | 4.2        | 2.84E-82  |
| HD0732                                                 | <i>radC</i> , DNA repair protein RadC                                     |         |          |            |          | 5.0        | 3.30E-61  |
| HD0746                                                 | <i>dltA</i> , Endo-1,4-beta-xylanase A                                    | -2.7    | 1.66E-12 | -2.7       | 1.08E-05 | -2.5       | 6.14E-38  |
| HD1123                                                 | Prepilin peptidase dependent protein D                                    | 2.2     | 6.86E-07 |            |          | 12.3       | 4.89E-214 |
| HD1124                                                 | <i>hofB</i> , protein transport protein; pili/fimbrial biogenesis protein |         |          |            |          | 10.5       | 1.30E-199 |
| HD1125                                                 | <i>hofC</i> , pili/fimbriae biogenesis protein                            |         |          |            |          | 4.6        | 4.64E-88  |
| HD1126                                                 | Fimbrial leader peptidase HopD                                            |         |          |            |          | 3.3        | 1.41E-48  |
| HD1256                                                 | <i>rec2</i> , recombination protein 2                                     |         |          |            |          | 5.9        | 7.90E-121 |
| HD1888                                                 | <i>smf</i> , DNA processing chain A                                       |         |          |            |          | 3.2        | 1.79E-49  |
| HD1985                                                 | DNA transformation protein, T(foX)/Sxy                                    | 2.3     | 3.31E-09 |            |          |            |           |
| <b>Cofactor biosynthesis</b>                           |                                                                           |         |          |            |          |            |           |
| HD1874                                                 | <i>ubiF</i> , ubiquinone biosynthesis hydroxylase                         |         |          |            |          | 2.9        | 9.00E-49  |
| <b>Generation of precursor metabolites and energy</b>  |                                                                           |         |          |            |          |            |           |
| HD1815                                                 | Dissimilatory sulfite reductase                                           | -2.5    | 2.30E-10 | -2.6       | 3.93E-05 |            |           |
| <b>Hypothetical proteins</b>                           |                                                                           |         |          |            |          |            |           |
| HD0055                                                 | Hypothetical protein                                                      |         |          |            |          | -2.3       | 3.54E-18  |
| HD0536                                                 | Hypothetical protein                                                      |         |          |            |          | 5.1        | 1.36E-02  |
| HD1060                                                 | Putative lipoprotein                                                      | -2.6    | 1.93E-11 | -2.4       | 1.29E-04 | -2.5       | 1.26E-38  |
| HD1439                                                 | Hypothetical protein                                                      | 2.1     | 2.71E-07 | 2.2        | 3.70E-04 | 2.1        | 2.56E-23  |
| HD1471                                                 | Hypothetical protein                                                      | -2.2    | 2.05E-08 | -2.6       | 3.04E-05 |            |           |
| HD1537                                                 | Hypothetical protein                                                      |         |          |            |          | -3.0       | 1.19E-08  |
| <b>Membrane transport/uptake</b>                       |                                                                           |         |          |            |          |            |           |
| HD0025                                                 | <i>dcuB1</i> , anaerobic C4-dicarboxylate transporter                     | -2.2    | 3.27E-08 |            |          |            |           |
| HD1074                                                 | <i>potD2</i> , spermidine/putrescine-binding protein                      | -2.2    | 1.63E-08 |            |          |            |           |
| HD1546                                                 | Putative ABC transporter                                                  |         |          |            |          | -2.8       | 3.96E-43  |
| HD1814                                                 | Transporter/inner membrane protein YccA                                   | -3.3    | 1.51E-17 | -3.3       | 1.49E-07 | -2.2       | 4.91E-27  |
| <b>Phage-associated proteins</b>                       |                                                                           |         |          |            |          |            |           |
| HD0535                                                 | Tail assembly protein                                                     |         |          |            |          | 7.7        | 1.79E-03  |
| HD1538                                                 | Putative phage-related DNA-binding protein                                |         |          |            |          | -2.4       | 1.32E-09  |
| <b>Translation</b>                                     |                                                                           |         |          |            |          |            |           |
| HD0319                                                 | <i>rlmN</i> , Ribosomal RNA large subunit methyltransferase N             |         |          |            |          | 5.4        | 3.42E-113 |
| HD1257                                                 | <i>queA</i> , S-adenosylmethionine:tRNA ribosyltransferase:isomerase      |         |          |            |          | 3.5        | 2.82E-63  |

53

54

55 TABLE S6. Promoters containing the putative *H. ducreyi* CpxR binding logo

| Gene          | Motif <sup>a</sup>       | Strand <sup>b</sup> | Position <sup>c</sup> | Score <sup>d</sup> | Position of additional motif(s) <sup>e</sup>                                      |
|---------------|--------------------------|---------------------|-----------------------|--------------------|-----------------------------------------------------------------------------------|
| <i>ackA</i>   | <b>TTTACCTGATTAGC</b>    | -                   | 129-16                | 4.6:2.9            |                                                                                   |
| <i>bioD</i>   | <b>GTAGATAAAATGTTAA</b>  | +                   | 431-16                | 3.9:3.5            | 213-199 (-)                                                                       |
| <i>ccmD</i>   | <b>GCAAAATGGGGCGAA</b>   | +                   | 305-291               | 4.0:2.7            | 376-61 (-)                                                                        |
| <i>comA</i>   | <b>GTAAGATTTGCATA</b>    | +                   | 290-76                | 4.6:2.6            | 364-49 (-), 283-70 (-), 72-57 (+), 353-40 (-), 324-11 (-)                         |
| <i>comF</i>   | <b>TTTGGCTTTTAAAC</b>    | -                   | 246-33                | 3.1:2.1            |                                                                                   |
| <i>cysK</i>   | <b>GTACATCTCGTAAT</b>    | +                   | 439-26                | 3.7:3.2            | 194-79 (+)                                                                        |
| <i>dsrA</i>   | <b>GCAGAATGAGTGTAA</b>   | +                   | 225-10                | 3.3:3.5            | 152-38 (+)                                                                        |
| <i>efp</i>    | <b>GCAAACTTGCTAA</b>     | +                   | 396-83                | 4.0:2.9            | 105-90 (-), 379-65 (-)                                                            |
| <i>fumC</i>   | <b>GTAAATCGCAAGTGCA</b>  | +                   | 138-23                | 4.6:2.4            | 279-65 (-)                                                                        |
| <i>gcvA</i>   | <b>GTTAATAAAACCAA</b>    | +                   | 295-82                | 3.5:3.1            | 248-33 (-), 262-49 (+), 242-28 (-), 253-38 (+), 286-73 (+), 237-24 (-)            |
| <i>HD0003</i> | <b>TTTACTTTTAAATTTAA</b> | -                   | 174-59                | 4.6:2.2            | 287-74 (-), 156-42 (+)                                                            |
| <i>HD0048</i> | <b>GTAAAAGGTCGTAAA</b>   | +                   | 140-26                | 4.6:4.6            | 286-71 (+), 80-66 (+), 403-388 (+), 344-30 (+), 157-44 (+), 54-39 (+), 339-25 (-) |
| <i>HD0182</i> | <b>TTTACCTTTCTTTGG</b>   | -                   | 416-02                | 4.6:3.1            | 303-290 (+), 204-190 (-), 426-12 (-), 171-56 (+), 208-194 (+), 359-44 (-)         |
| <i>HD0226</i> | <b>TTTACACGCATTGCAC</b>  | -                   | 383-68                | 4.6:2.4            | 194-79 (-)                                                                        |
| <i>HD0318</i> | <b>GTAATTTGGCAA</b>      | +                   | 76-63                 | 4.6:4.0            | 179-64 (-), 386-72 (+), 341-27 (+), 204-191 (+)                                   |
| <i>HD0589</i> | <b>TTTACCTTTCTTTTAA</b>  | -                   | 235-20                | 4.6:2.2            | 319-04 (+), 210-197 (-)                                                           |
| <i>HD0650</i> | <b>TTAACTTAAATTGC</b>    | -                   | 81-68                 | 3.5:2.6            | 242-28 (-), 389-76 (-)                                                            |
| <i>HD0805</i> | <b>TTTACACAACCATTAC</b>  | -                   | 119-04                | 4.6:3.2            | 96-83 (+), 438-25 (+)                                                             |
| <i>HD1017</i> | <b>GTAATAAGGGTAGA</b>    | +                   | 364-50                | 4.6:3.9            | 344-31 (+), 354-31 (+), 245-31 (-), 200-186 (+)                                   |
| <i>HD1096</i> | <b>TTTACATTTTTTTTGC</b>  | -                   | 75-60                 | 4.6:4.0            | 64-50 (-), 140-26 (+), 93-79 (+)                                                  |
| <i>HD1123</i> | <b>TTTGCTGCCCTTTC</b>    | -                   | 210-197               | 4.0:4.0            | 201-188 (-), 322-08 (-)                                                           |
| <i>HD1252</i> | <b>GTAGAATTATTTAA</b>    | +                   | 131-18                | 3.9:2.2            |                                                                                   |
| <i>HD1313</i> | <b>GTAAAATACTGCAAT</b>   | +                   | 212-198               | 4.6:2.6            | 437-23 (+), 151-37 (+)                                                            |
| <i>HD1432</i> | <b>GTAATTTAAAAGTAAA</b>  | +                   | 211-196               | 4.6:4.6            |                                                                                   |
| <i>HD1439</i> | <b>TTTACCGCATTAAC</b>    | -                   | 322-09                | 4.6:3.5            | 322-09 (+)                                                                        |
| <i>HD1495</i> | <b>TTTACTGTTTCTGC</b>    | -                   | 336-23                | 4.6:3.3            | 386-73 (+), 111-98 (+), 216-01 (+)                                                |
| <i>HD1515</i> | <b>TTTACATTTTTTTATGC</b> | -                   | 58-43                 | 4.6:2.6            | 110-96 (-)                                                                        |
| <i>HD1920</i> | <b>GCAAATCTTGACACA</b>   | +                   | 317-04                | 4.0:3.1            | 439-25 (-), 236-23 (+)                                                            |
| <i>HD1985</i> | <b>TTTACTGTATCTTAC</b>   | -                   | 162-49                | 4.6:3.9            | 306-292 (-), 337-24 (-), 429-14 (-)                                               |
| <i>HD2037</i> | <b>TTTACATTAATTAC</b>    | -                   | 363-50                | 4.6:3.2            | 144-31 (-)                                                                        |
| <i>hhdA</i>   | <b>GTAGAGTATGCAAG</b>    | +                   | 173-60                | 3.9:2.4            | 347-33 (+)                                                                        |
| <i>hhdB</i>   | <b>GTTAATTAGATCTAAC</b>  | +                   | 144-29                | 3.5:2.3            | 193-80 (-)                                                                        |
| <i>lldD</i>   | <b>TTTACAAAAAATTCAC</b>  | -                   | 113-98                | 4.6:3.3            | 165-51 (-), 294-80 (+), 123-09 (-), 343-29 (-)                                    |
| <i>lspB</i>   | <b>GTAATTAATGTATA</b>    | +                   | 53-39                 | 4.6:3.2            | 73-60 (+), 291-77 (+), 116-03 (+), 170-57 (+), 435-21 (-)                         |
| <i>moaA</i>   | <b>GCAAATTAGGTATA</b>    | +                   | 293-80                | 4.0:3.2            | 284-70 (+)                                                                        |
| <i>nrfA</i>   | <b>GTAATTTAAAAGTTAT</b>  | +                   | 255-41                | 4.6:2.1            | 438-23 (-)                                                                        |
| <i>ompA2</i>  | <b>GTAAGGTCGTAAA</b>     | +                   | 370-56                | 4.6:4.6            | 225-12 (-), 196-81 (-), 101-88 (-)                                                |
| <i>ompP1</i>  | <b>CTAAAAGATAGCTAA</b>   | +                   | 303-288               | 3.7:2.9            |                                                                                   |
| <i>ompP2A</i> | <b>TTTACTTTTAAATTTAC</b> | -                   | 303-288               | 4.6:4.6            | 270-57 (+)                                                                        |
| <i>ompP4</i>  | <b>TGTACTCTATATAC</b>    | -                   | 77-64                 | 3.7:3.2            | 400-386 (-)                                                                       |
| <i>queA</i>   | <b>TTTACATCCATTAAC</b>   | -                   | 215-01                | 4.6:3.5            | 300-286 (-), 311-296 (-), 188-74 (-)                                              |
| <i>queF</i>   | <b>GTGAAAAAAAAGCAGA</b>  | +                   | 74-59                 | 3.3:3.3            | 63-50 (+)                                                                         |
| <i>radC</i>   | <b>GTAATACCAACTAAA</b>   | +                   | 248-34                | 3.2:3.7            |                                                                                   |
| <i>rec2</i>   | <b>TTTACCTGATTTTAT</b>   | -                   | 406-391               | 4.6:1.8            | 65-52(+)                                                                          |
| <i>selD</i>   | <b>GTAAAATTTTACTAAA</b>  | +                   | 142-27                | 4.6:3.7            | 381-66 (-), 370-55 (-), 449-34 (-), 250-37 (+), 438-23 (-)                        |
| <i>slyX</i>   | <b>TTTACTTTTTTCAGC</b>   | -                   | 412-398               | 4.6:2.2            | 141-28 (+), 421-08 (-), 171-58 (-), 162-49 (-), 363-50 (-)                        |
| <i>smf</i>    | <b>TTACATACTTTAG</b>     | -                   | 246-33                | 3.3:3.7            | 79-66 (-)                                                                         |
| <i>sodC</i>   | <b>GTAAATCTTTGCATA</b>   | +                   | 77-63                 | 4.6:2.6            | 198-83 (-), 138-25 (+), 450-36 (+)                                                |
| <i>torY</i>   | <b>GTAAGATTTGTTAT</b>    | +                   | 115-01                | 4.6:2.1            | 371-57 (-), 232-19 (+), 145-32 (-)                                                |
| <i>ubiF</i>   | <b>GTAATAACAGTAGC</b>    | +                   | 72-58                 | 4.6:2.6            | 321-06 (+), 105-91 (+), 211-197 (+), 273-58 (-), 341-27 (-)                       |
| <i>ulaA</i>   | <b>TTTACTTTTAAATTTAC</b> | -                   | 152-37                | 4.6:4.6            |                                                                                   |

56 <sup>a</sup>The sequence corresponds to the motif with the highest match score; putative conserved residues are highlighted in bold.

57 <sup>b</sup>Corresponds to the motif with the highest match score.

58 <sup>c</sup>Corresponds to the motif with the highest match score; position of the motif in the promoter region relative to the start codon.

59 <sup>d</sup>Corresponds to the motif with the highest match score; match score is the sum of individual position scores from each letter in the sequence.

60 <sup>e</sup>Position of additional motifs identified in the promoter regions relative to start codon.

61 +Template strand; -Complementary strand.
